# Supplementary material
Source: publisher site journal article supplement (https://www.dovepress.com/article/101212)
Supplement: Supplementary file 1 [file get_supplementary_file.php]

**Supplementary data of (FVII- F2 and F3)**

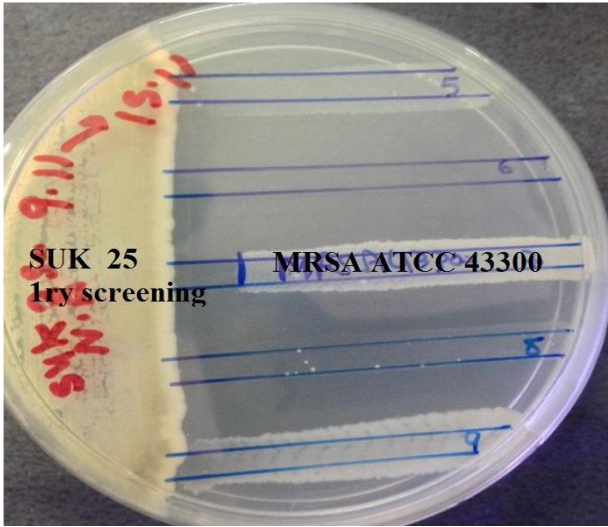

Photo 1: Primary screening of SUK 25 against MRSA ATCC 43300.

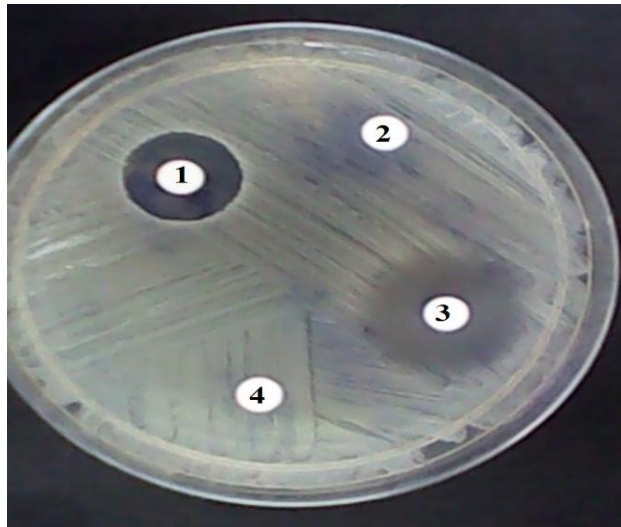

Photo 2: Secondary screening of crude extract 1, Standard positive control vancomycin; 2, Negative control MeOH; 3, Crude extract from SUK 25; 4, Negative control MHB.

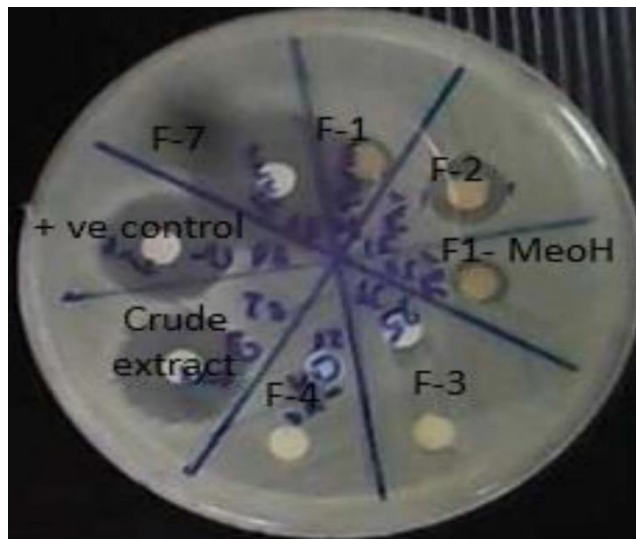

Photo3: Bioautography using the disc diffusion method of purified fractions from CC against MRSA. FVII showed the strongest activity against MRSA.

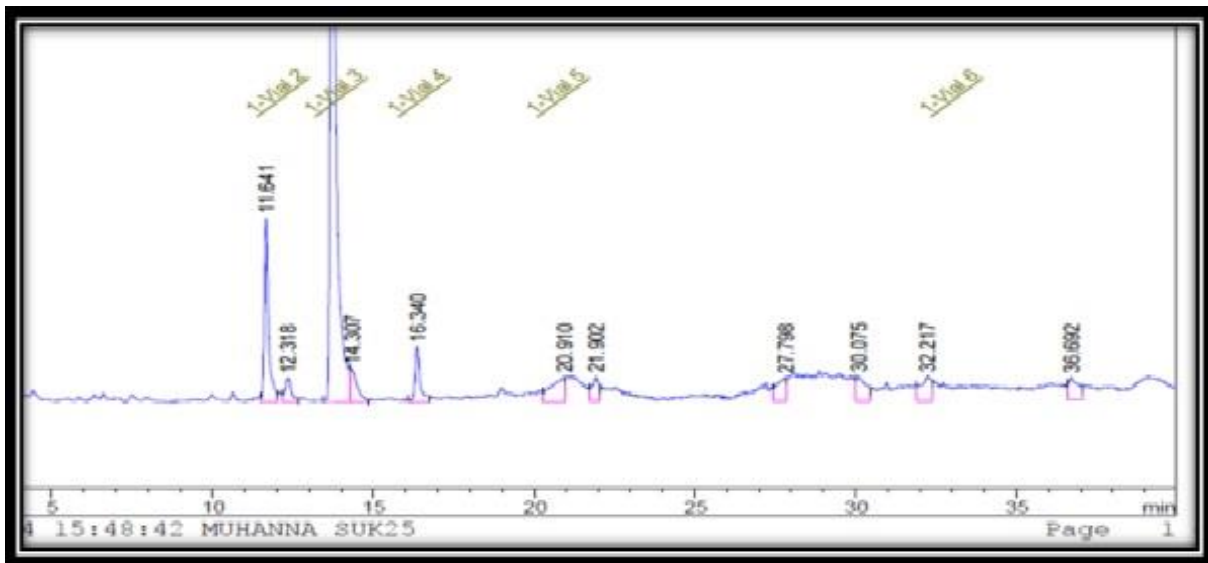

**Figure S1. Preparative HPLC of fraction number 7 (FVII)**

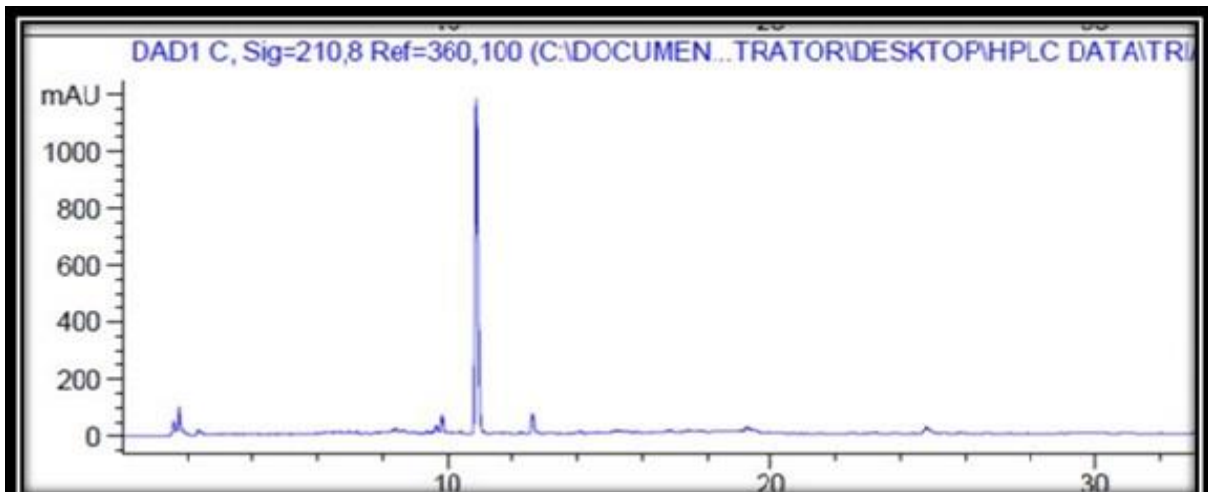

**Figure S2. Analytical HPLC of subfraction (F3) in fraction number FVII. Confirm the purity.**

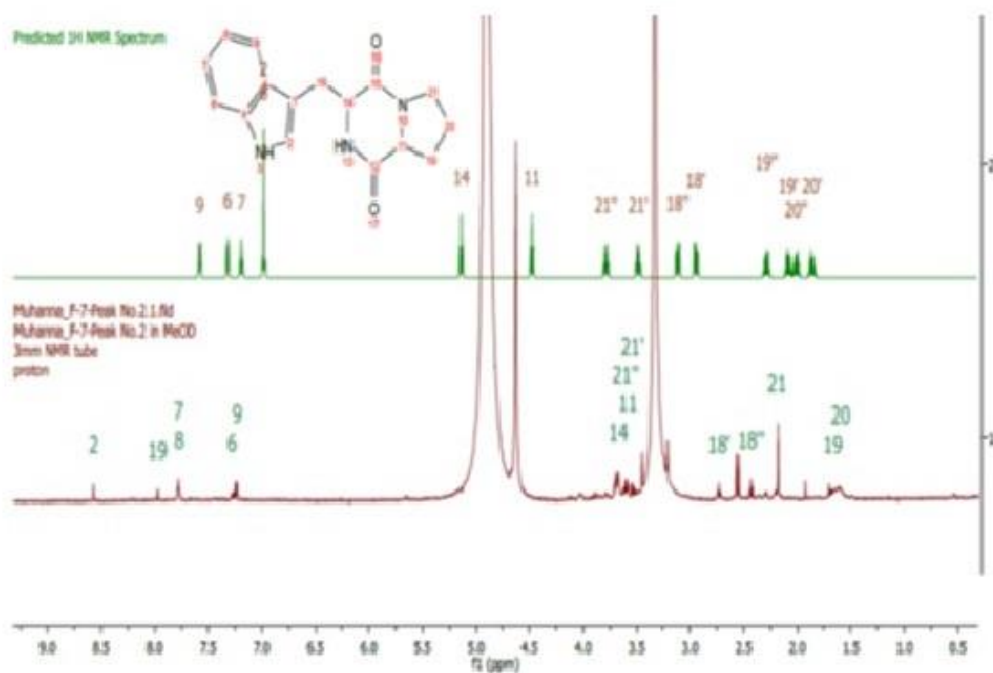

Figure S3. Proton  $^1\text{H}$  NMR spectroscopy spectrum of (FVII- F2).

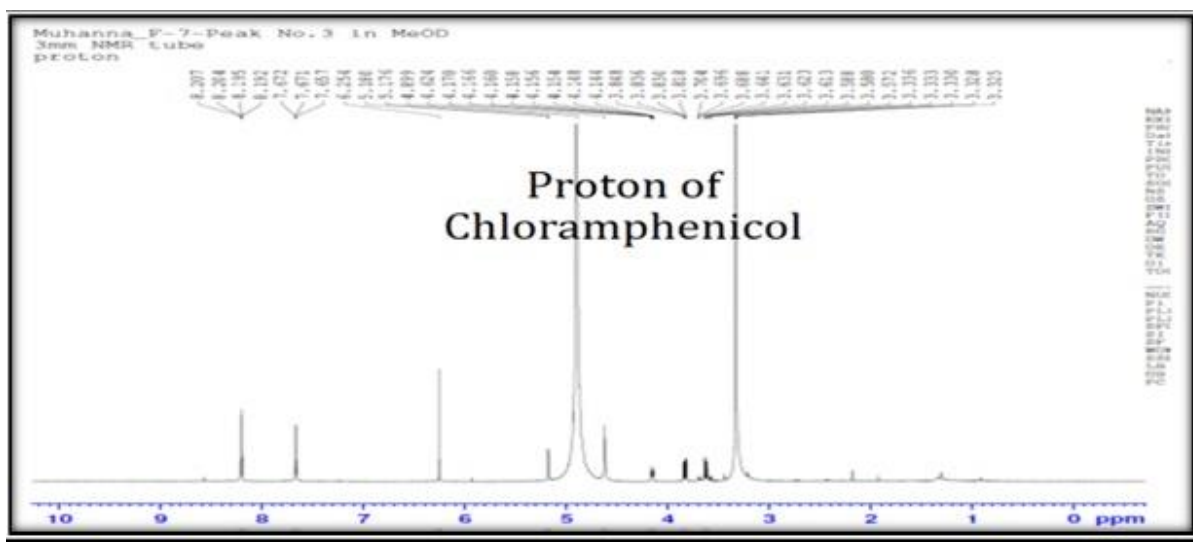

Figure S4. Proton  $^1\text{H}$  NMR spectroscopy spectrum of (FVII- F3) showed 12 protons.

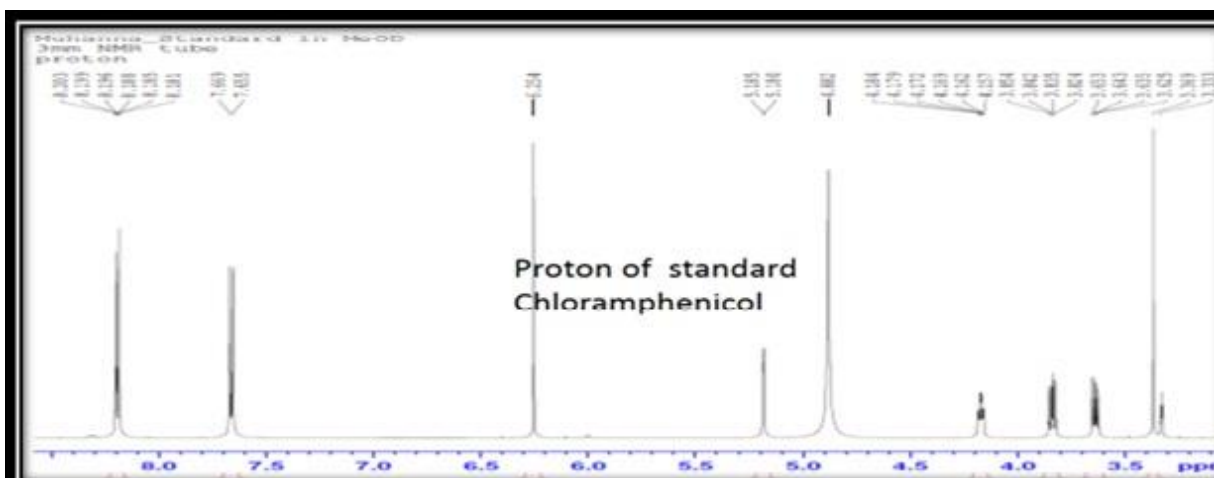

Figure S5. Proton  $^1\text{H}$  NMR spectroscopy spectrum of standard CAP (Sigma).

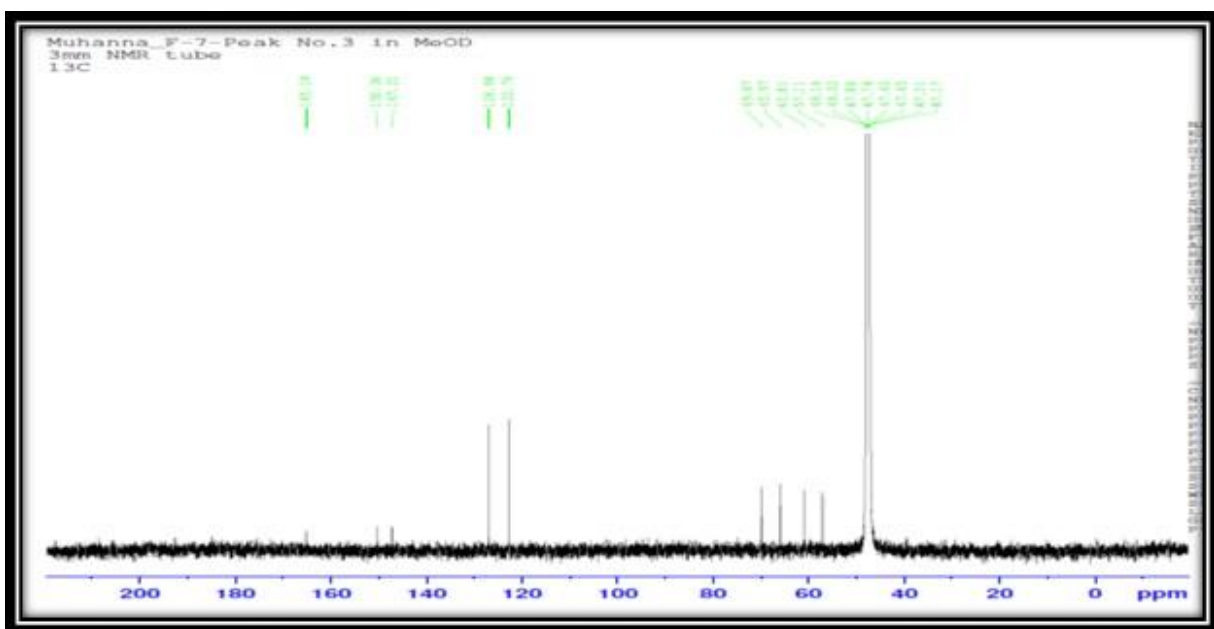

Figure S6. Shows the  $^{13}\text{C}$ -NMR spectrum of (FVII-F3).

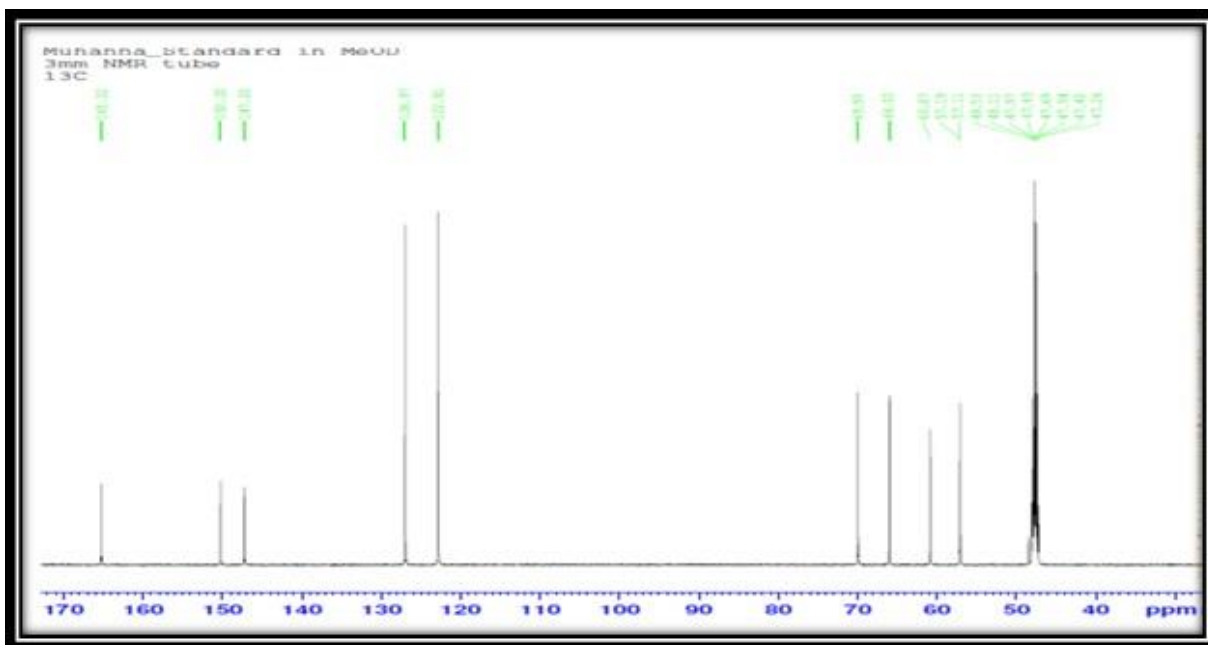

Figure S7. Shows the  $^{13}\text{C}$ -NMR spectrum of standard CAP from (Sigma).

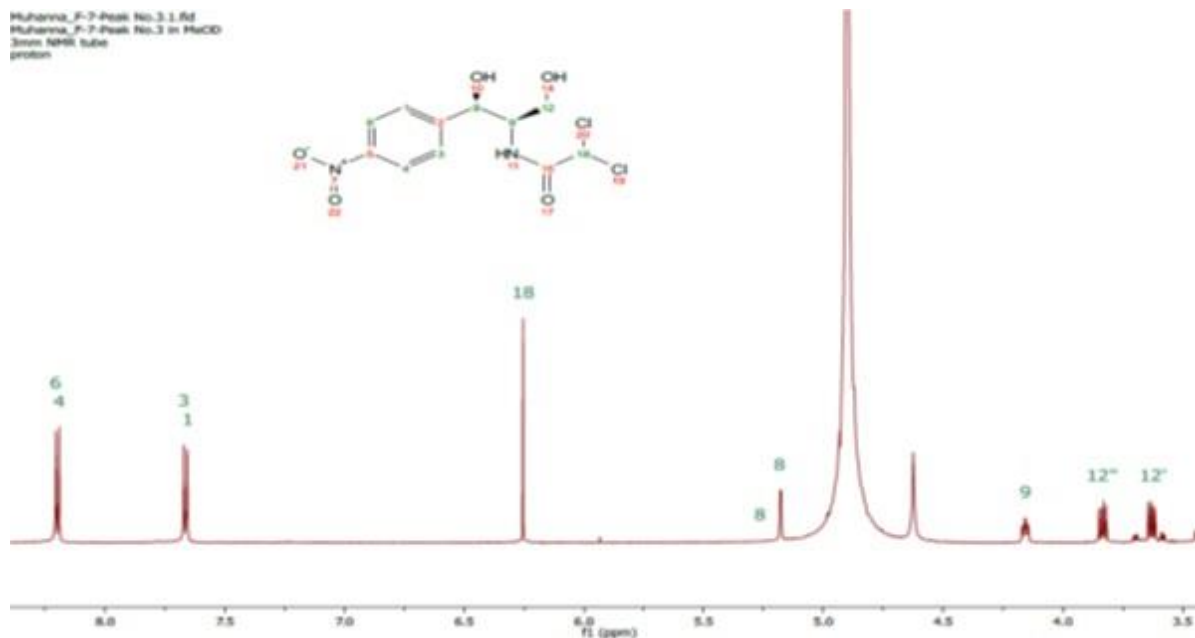

Figure S8. Proton  $^1\text{H}$  NMR spectroscopy spectrum of (FVII- F3) identification as CAP.

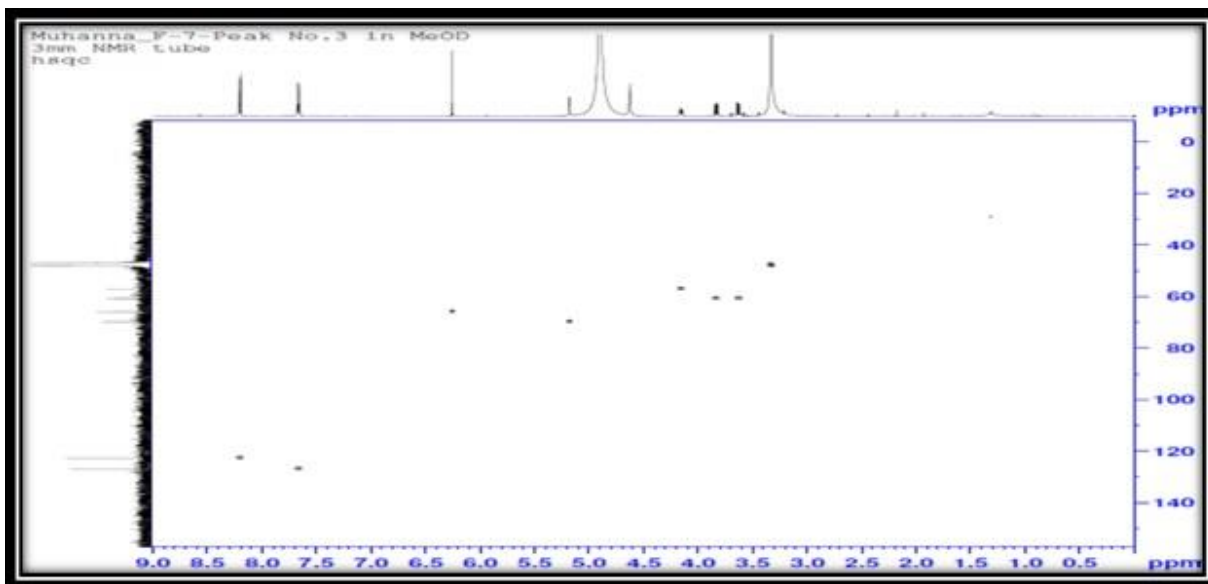

Figure S9. HSQC  $^1\text{H}$ -  $^{13}\text{C}$  2D- NMR spectroscopy spectrum of (FVII- F3)

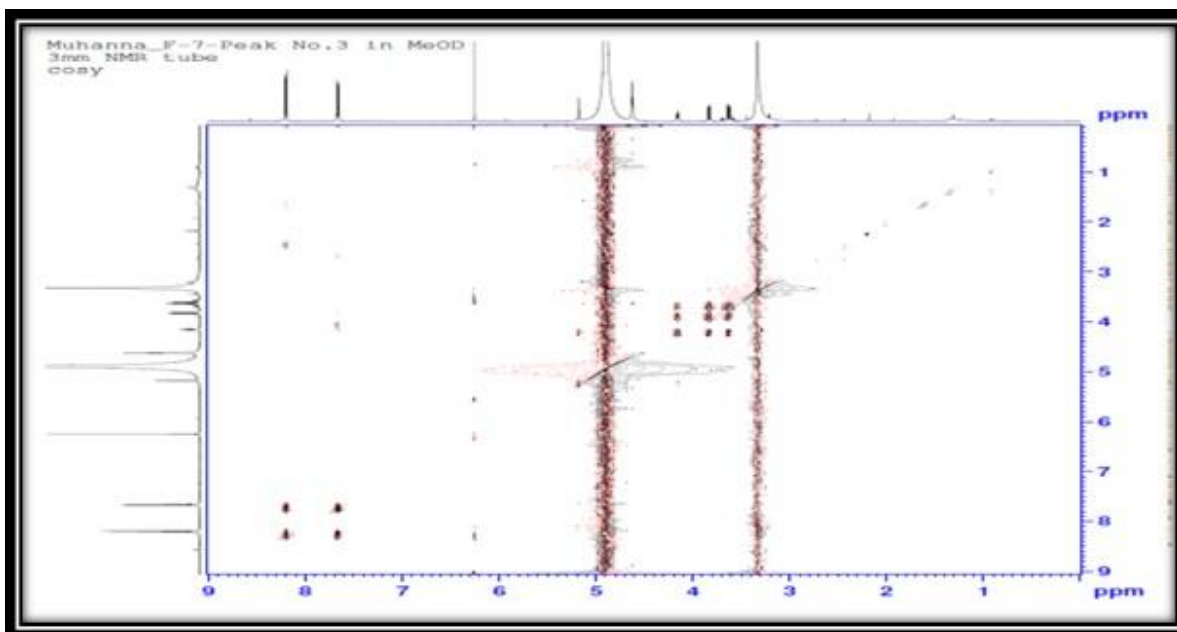

Figure S10. COSY  $^1\text{H}$ -  $^1\text{H}$  2D- NMR spectroscopy spectrum of (FVII- F3)

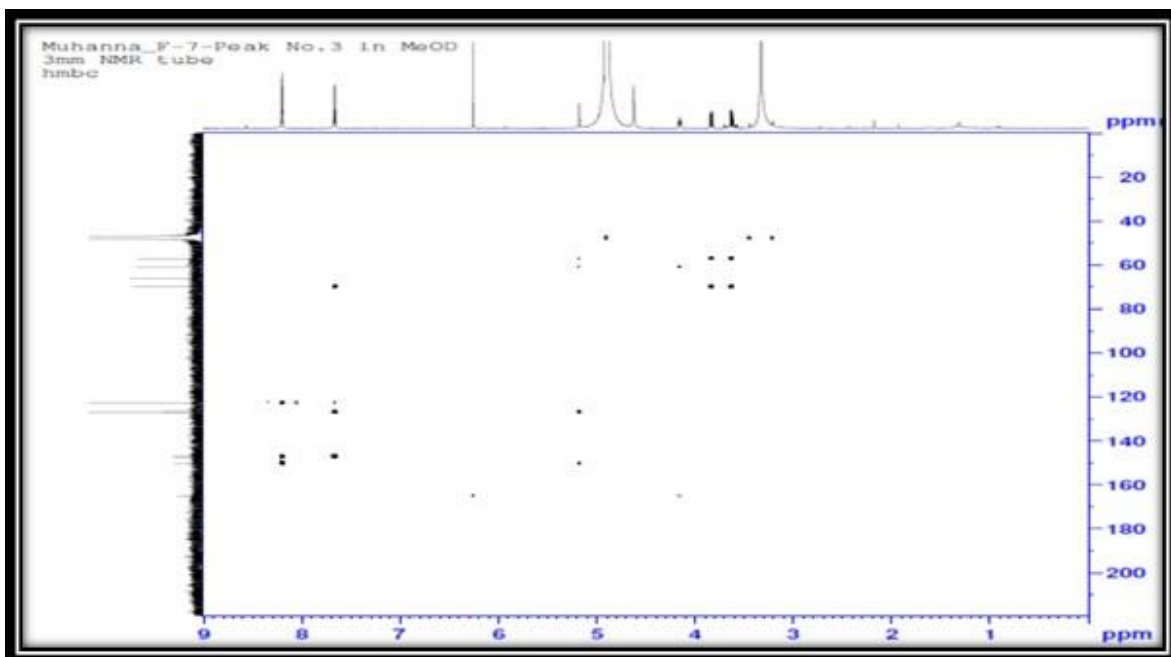

Figure S11. HMBC  $^1\text{H}$ - $^{13}\text{C}$  2D- NMR spectroscopy spectrum of (FVII- F3)

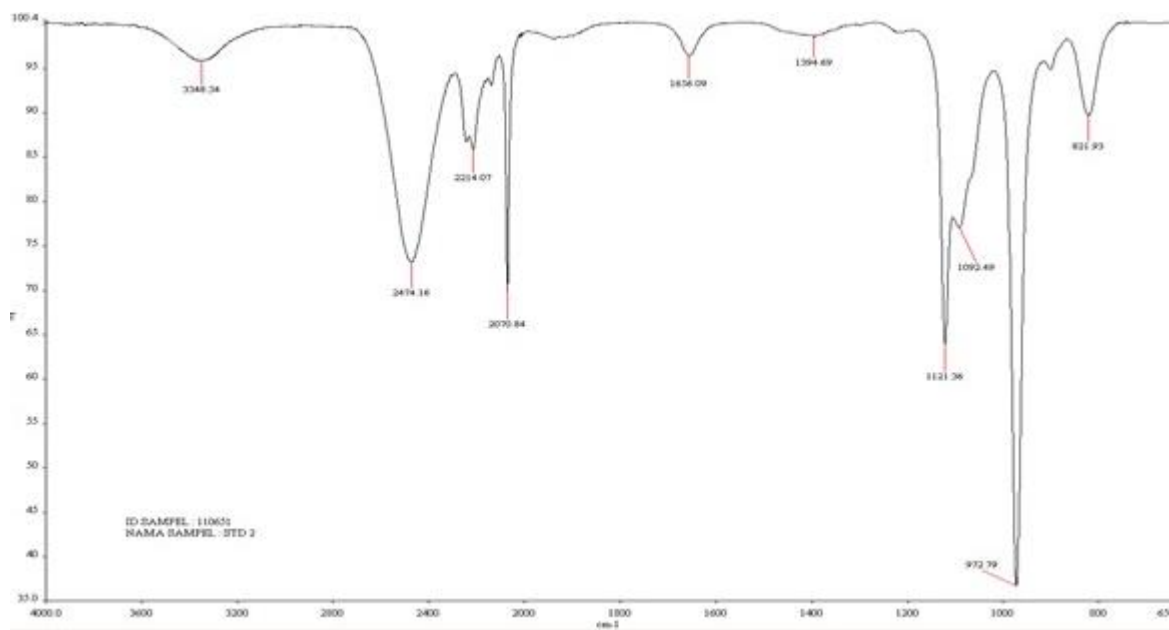

Figure S12. FT- IR spectroscopy spectra of (FVII- F2)



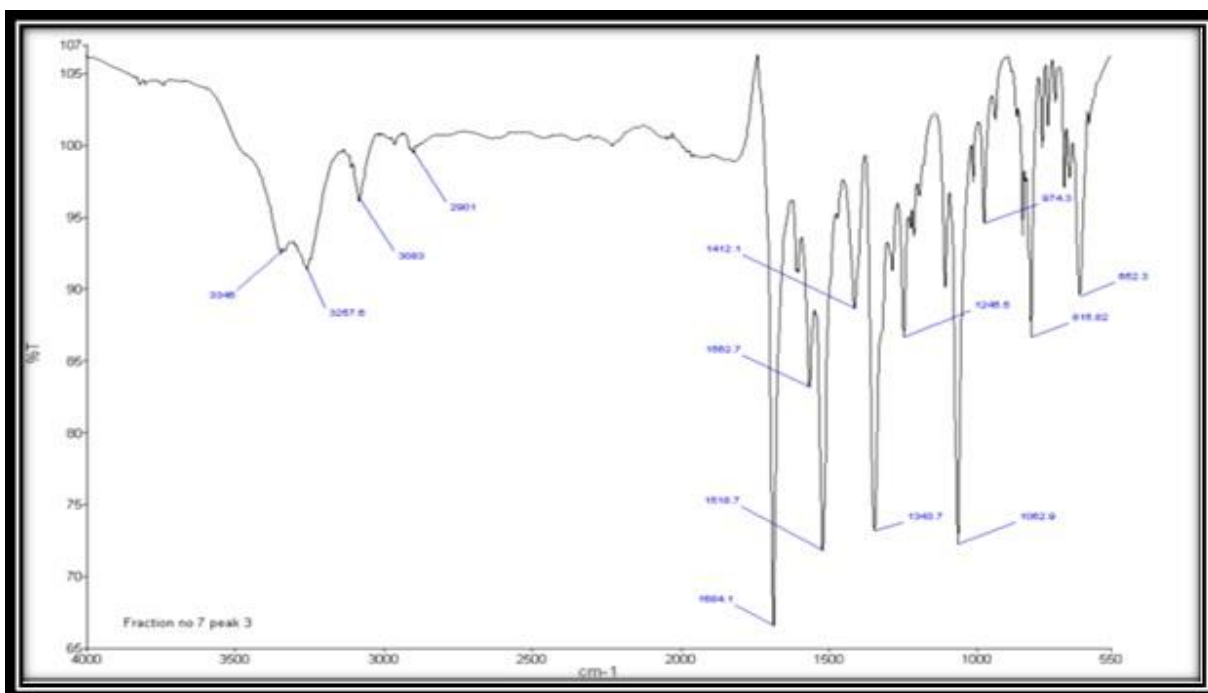

**Figure S13. FT- IR spectroscopy spectra of (FVII- F3)**

**Table S1. The flow rate of PRE- HPLC as in table below.**

| Time | % Acetonitrile | Flow rate (mL/min) |
|------|----------------|--------------------|
| 0    | 20             | 0.3                |
| 5    | 20             | 0.3                |
| 10   | 80             | 0.3                |
| 15   | 100            | 0.5                |
| 20   | 100            | 0.5                |
| 30   | 20             | 0.3                |

**Table S2. The FTIR spectra data of FVII (F2 & F3) listed in table below which support the proposed structure in the solid state.**

| Frequency Wave number $\text{cm}^{-1}$ | Assignment                                                                                                              |
|----------------------------------------|-------------------------------------------------------------------------------------------------------------------------|
| 3345- 3257                             | NH <sub>2</sub> group and O-H stretching                                                                                |
| 3083                                   | Aromatic C-H stretching                                                                                                 |
| 2901                                   | Aromatic C-H stretching                                                                                                 |
| 1684                                   | Phenyl group- or carbonyl group                                                                                         |
| 1562                                   | N-O stretch(ArNO <sub>2</sub> )& C-C stretching vibrations                                                              |
| 1412                                   | C-H deformations & C-C stretching vibrations                                                                            |
| 1343                                   | C-H bending                                                                                                             |
| 1245                                   | O-H bending                                                                                                             |
| 1062                                   | C-O stretch (Primary alcohol)                                                                                           |
| 974                                    | C-N stretch- C - Chlorine                                                                                               |
| 815                                    | Meta di substituted aromatic ring ortho-di substituted aromatic ring due to -H, moving out of plane of the benzene ring |
| 652                                    | C- chlorine bonds                                                                                                       |
